# Supplementary material for: Relative Telomere Length Change in Colorectal Carcinoma and its Association with Tumor Characteristics, Gene Expression and Microsatellite Instability
Source: Cancers (Basel). 2022 Apr 30;14(9):2250. doi: 10.3390/cancers14092250 (PMC9105685; doi:10.3390/cancers14092250)
Supplement: Supplementary file 1 [file cancers-14-02250-s001.zip]

Archive with 17 entries (17 files):
- cancers-1689374-final-suppl method.pdf
- Figure S1.jpg
- Figure S10.jpg
- Figure S11.jpg
- Figure S2.jpg
- Figure S3.jpg
- Figure S4.jpg
- Figure S5.jpg
- Figure S6.jpg
- Figure S7.jpg
- Figure S8.jpg
- Figure S9.jpg
- Table S1_GX_Patient Characteristics.xls
- Table S2_TELmaintenanceGenes_GX_PairedAnalysis.xlsx
- Table S3_ANOVA_Paired_GX_CancerRelatedGeneGroupProbes.xlsx
- Table S4_Enrichment_KEGG_InteractionTELshortening.xlsx
- Table S5_GO-ANOVA_GX_KEGG_InteracTELshortening_All Pts.xls
