# Supplementary material for: Relative Telomere Length Change in Colorectal Carcinoma and its Association with Tumor Characteristics, Gene Expression and Microsatellite Instability
Source: Cancers (Basel). 2022 Apr 30;14(9):2250. doi: 10.3390/cancers14092250 (PMC9105685; doi:10.3390/cancers14092250)
Supplement: Supplementary file 1 [file cancers-14-02250-s001.zip › Table S1_GX_Patient Characteristics.xls]

## Sheet: Sheet1
Table Suppl1: Patient characteristics of the 71 CRC patients with Gene expression data available
Characteristics	Category	Male (n=43)	Female (n=28)	p-value
Age (yrs.)	mean	46.88	43.39	0.307
	(SD)	15.03	12.16
Age category	=<40 yrs	15	12	0.618
	>40 yrs	28	16
Location	Left	33	25	0.223
	Right	10	3
Stage	Stage-I	8	4	0.756
	Stage-II	12	10
	Stage-III	23	14
Gade	Low	35	22	0.77
	High	8	6
Microsatellite	MSI	14	4	0.101
	MSS	29	24
KRAS	Wild	30	21	0.788
	Mutant	13	7
BRAFV600E	Wild	43	27	0.394
	Mutant	0	1
