# Supplementary material for: Relative Telomere Length Change in Colorectal Carcinoma and its Association with Tumor Characteristics, Gene Expression and Microsatellite Instability
Source: Cancers (Basel). 2022 Apr 30;14(9):2250. doi: 10.3390/cancers14092250 (PMC9105685; doi:10.3390/cancers14092250)
Supplement: Supplementary file 1 [file cancers-14-02250-s001.zip › Table S2_TELmaintenanceGenes_GX_PairedAnalysis.xlsx]

## Sheet: Table S1_TELmaintenanceGenes_GX
Probeset ID	SYMBOL	Category	Mean(CRC)	LSMean(CRC)	Mean(Normal)	LSMean(Normal)	p-value(CRC vs. Normal)
ILMN_1671257	DKC1	telomere maintenance	10.4695	10.4665	9.65268	9.64065	5.24e-19
ILMN_1718672	NHP2	telomere maintenance	9.1111	9.10676	8.63279	8.62102	7.95e-10
ILMN_2365544	NHP2	telomere maintenance	9.22239	9.22228	8.73494	8.71674	1.65e-09
ILMN_3263329	GAR1	telomere maintenance	8.40481	8.40153	8.05822	8.03501	2.35e-09
ILMN_2412549	GAR1	telomere maintenance	9.72577	9.72632	9.3801	9.37416	6.04e-09
ILMN_1708954	GAR1	telomere maintenance	6.85451	6.85843	6.59917	6.59472	1.61e-08
ILMN_3226807	NHP2	telomere maintenance	8.6641	8.65761	8.24596	8.23851	3.95e-08
ILMN_3231390	NHP2	telomere maintenance	10.0756	10.0757	9.63218	9.61302	6.79e-08
ILMN_1796005	TERT	telomere maintenance	5.78156	5.78044	5.70932	5.70537	0.00372771
ILMN_1766573	TERC	telomere maintenance	6.43261	6.43277	6.32998	6.31526	0.0128932
ILMN_1815479	NOP10	telomere maintenance	11.129	11.1276	11.0433	11.0258	0.0491745
ILMN_2373119	TERT	telomere maintenance	5.95413	5.95584	5.93083	5.93341	0.179029
ILMN_3240247	NOP10	telomere maintenance	11.5162	11.512	11.4724	11.4631	0.231893
ILMN_2357382	TERF1	shelterin-telosome protein complex	6.23319	6.22949	6.12386	6.11853	2.12e-05
ILMN_1697420	TINF2	shelterin-telosome protein complex	8.97956	8.98227	9.22	9.21432	7.07e-05
ILMN_1694847	TERF1	shelterin-telosome protein complex	8.03904	8.04207	7.86213	7.86383	0.0008325
ILMN_1692041	POT1	shelterin-telosome protein complex	5.94929	5.94989	5.86465	5.86317	0.00131802
ILMN_2327203	POT1	shelterin-telosome protein complex	6.67936	6.68111	6.59299	6.58565	0.00508644
ILMN_1657983	TERF2IP	shelterin-telosome protein complex	8.71083	8.70894	8.81102	8.81789	0.00534996
ILMN_1729234	TPP1	shelterin-telosome protein complex	9.4672	9.47481	9.57692	9.57772	0.0447682
ILMN_2357377	TERF1	shelterin-telosome protein complex	6.06274	6.06003	6.07212	6.07991	0.342672
ILMN_2287707	POT1	shelterin-telosome protein complex	5.72301	5.72353	5.71363	5.71488	0.590745
ILMN_1768488	TERF2	shelterin-telosome protein complex	8.13278	8.13056	8.12506	8.12935	0.975728
ILMN_1705594	NAT10	non-canonical	9.28894	9.29084	8.5884	8.58756	1.23e-16
ILMN_2126239	SMG5	non-canonical	8.6619	8.6519	8.33308	8.33536	8.59e-11
ILMN_1716480	ACD	non-canonical	7.64301	7.646	7.33346	7.33866	4.23e-10
ILMN_1671583	MKRN1	non-canonical	10.9802	10.9791	11.3074	11.3104	3e-09
ILMN_1693669	WDR79	non-canonical	6.56422	6.54994	6.30678	6.30835	5.81e-07
ILMN_1804610	NFX1	non-canonical	8.82999	8.82542	9.00203	9.01308	0.00031397
ILMN_1770682	TEP1	non-canonical	6.24711	6.24707	6.33638	6.33452	0.000625944
ILMN_1656691	FBXO4	non-canonical	7.24964	7.24673	7.11299	7.10431	0.00162334
ILMN_1795025	NFX1	non-canonical	6.39623	6.39053	6.51562	6.5386	0.00231048
ILMN_2134056	SOX7	non-canonical	6.22869	6.22577	6.14256	6.13859	0.00346519
ILMN_1744959	NFX1	non-canonical	7.31282	7.30404	7.39544	7.39716	0.00998482
ILMN_1755811	FBXO4	non-canonical	6.63256	6.62905	6.5671	6.56424	0.0131592
ILMN_1784227	MCRS1	non-canonical	9.69335	9.6934	9.74863	9.75342	0.0576647
ILMN_1713147	MCRS1	non-canonical	6.50761	6.50166	6.44573	6.43566	0.114613
ILMN_1815032	SOX7	non-canonical	6.7894	6.7938	6.73373	6.73835	0.166648
ILMN_1695280	SMG6	non-canonical	6.49532	6.49646	6.46886	6.46677	0.187243
ILMN_1698402	NFX1	non-canonical	6.56545	6.56208	6.52855	6.52235	0.324603
ILMN_1757355	FBXO4	non-canonical	6.19864	6.19837	6.22286	6.22369	0.377198
ILMN_1727789	RNF12	non-canonical	6.31749	6.31772	6.3309	6.33641	0.382354
ILMN_2254182	RNF12	non-canonical	6.14149	6.14766	6.16194	6.16167	0.504441
ILMN_2335109	RNF12	non-canonical	6.10604	6.10322	6.11295	6.11267	0.666016
ILMN_3239789	YLPM1	non-canonical	6.23917	6.2387	6.24841	6.24447	0.79716
ILMN_2133205	GPX2	non-canonical	12.4033	12.3818	12.4151	12.4161	0.843573
ILMN_1708077	DAXX	Alternative lengthening	7.39791	7.39041	7.26627	7.26965	0.00581906
ILMN_1657891	TNKS	Alternative lengthening	6.55445	6.54866	6.50734	6.50077	0.0177976
ILMN_2334256	ATRX	Alternative lengthening	5.69915	5.69194	5.65643	5.65784	0.0343313
ILMN_1666885	ATRX	Alternative lengthening	6.46206	6.4651	6.43195	6.43028	0.0647316
ILMN_1726576	ATRX	Alternative lengthening	6.17218	6.1749	6.16969	6.17289	0.930089
