# Supplementary material for: Relative Telomere Length Change in Colorectal Carcinoma and its Association with Tumor Characteristics, Gene Expression and Microsatellite Instability
Source: Cancers (Basel). 2022 Apr 30;14(9):2250. doi: 10.3390/cancers14092250 (PMC9105685; doi:10.3390/cancers14092250)
Supplement: Supplementary file 1 [file cancers-14-02250-s001.zip › Table S3_ANOVA_Paired_GX_CancerRelatedGeneGroupProbes.xlsx]

## Sheet: Table S2_ANOVA_Paired_GX_Cancer
Probeset ID	SYMBOL	Category	Mean(CRC)	LSMean(CRC)	Mean(Normal)	LSMean(Normal)	p-value(CRC vs. Normal)	Fold-Change(CRC vs. Normal)	Fold-Change(CRC vs. Normal) (Description)	Fold Change(CRC vs. Normal) 95% lower limit	Fold Change(CRC vs. Normal) 95% upper limit
ILMN_2246956	BCL2	Anti-Apoptosis	7.5524	7.5649	8.45557	8.45819	2.26393e-20	-1.8574	CRC down vs Normal	-2.03696	-1.69368
ILMN_1801119	BCL2	Anti-Apoptosis	7.2165	7.22992	8.01127	8.00908	1.71378e-18	-1.71613	CRC down vs Normal	-1.87453	-1.57112
ILMN_1654118	BCL2L1	Anti-Apoptosis	10.5303	10.5225	9.89733	9.91075	5.02595e-13	1.52815	CRC up vs Normal	1.39085	1.67899
ILMN_1742410	BCL2L1	Anti-Apoptosis	7.07464	7.07856	6.79453	6.7828	1.10945e-09	1.22753	CRC up vs Normal	1.15884	1.30029
ILMN_1701120	BCL2	Anti-Apoptosis	5.96488	5.96575	6.01518	6.01117	0.0842871	-1.03199	CRC down vs Normal	-1.06968	1.00439
ILMN_2363250	BCL2	Anti-Apoptosis	6.32934	6.3356	6.36438	6.37197	0.209135	-1.02553	CRC down vs Normal	-1.06705	1.01459
ILMN_1756806	MCL1	Anti-Apoptosis	7.81701	7.83045	7.88676	7.87278	0.62778	-1.02978	CRC down vs Normal	-1.16141	1.09521
ILMN_1803988	MCL1	Anti-Apoptosis	10.485	10.4919	10.526	10.5111	0.800354	-1.0134	CRC down vs Normal	-1.12527	1.0957
ILMN_2373763	CASP7	Caspases_Exetutor	8.30837	8.31252	9.05282	9.05114	2.5366e-15	-1.66858	CRC down vs Normal	-1.84241	-1.51114
ILMN_2362974	CASP7	Caspases_Exetutor	6.63949	6.63956	7.03925	7.04162	1.31784e-09	-1.32139	CRC down vs Normal	-1.42965	-1.22132
ILMN_2388155	CASP3	Caspases_Exetutor	9.38629	9.38474	9.64397	9.64634	5.86583e-07	-1.19881	CRC down vs Normal	-1.27978	-1.12296
ILMN_1731639	CASP3	Caspases_Exetutor	6.6771	6.67507	6.77118	6.77448	4.14995e-05	-1.07134	CRC down vs Normal	-1.1054	-1.03833
ILMN_1694877	CASP6	Caspases_Exetutor	7.49154	7.47499	7.63152	7.64248	0.00157386	-1.1231	CRC down vs Normal	-1.20486	-1.04689
ILMN_1730332	CASP7	Caspases_Exetutor	6.38469	6.38642	6.43971	6.4421	0.00191145	-1.03935	CRC down vs Normal	-1.0644	-1.01488
ILMN_2367113	CASP6	Caspases_Exetutor	7.76556	7.76388	7.94647	7.93938	0.0126367	-1.12936	CRC down vs Normal	-1.24156	-1.0273
ILMN_1659350	CASP6	Caspases_Exetutor	6.75093	6.74409	6.83593	6.82741	0.0812588	-1.05946	CRC down vs Normal	-1.13076	1.0074
ILMN_1736568	CASP2	Caspases_Initiator	7.70705	7.71065	7.44219	7.42014	1.07405e-07	1.22307	CRC up vs Normal	1.14345	1.30824
ILMN_2296057	CASP2	Caspases_Initiator	6.1402	6.14	5.99974	5.99371	8.90507e-06	1.10672	CRC up vs Normal	1.06121	1.15418
ILMN_2410540	CASP2	Caspases_Initiator	10.4557	10.4606	10.2784	10.2737	3.2805e-05	1.13834	CRC up vs Normal	1.07422	1.20629
ILMN_1718070	CASP9	Caspases_Initiator	7.32023	7.3165	7.41969	7.42611	0.00433296	-1.07894	CRC down vs Normal	-1.13576	-1.02496
ILMN_1786046	CASP9	Caspases_Initiator	6.58712	6.5856	6.62301	6.62975	0.0381774	-1.03107	CRC down vs Normal	-1.06129	-1.00172
ILMN_1673757	CASP8	Caspases_Initiator	6.13876	6.14333	6.12268	6.10956	0.365174	1.02368	CRC up vs Normal	-1.02825	1.07753
ILMN_2321720	CASP10	Caspases_Initiator	6.27669	6.27367	6.29154	6.29848	0.384622	-1.01734	CRC down vs Normal	-1.05804	1.02228
ILMN_1669565	CASP8	Caspases_Initiator	6.07654	6.07232	6.05568	6.05858	0.518429	1.00957	CRC up vs Normal	-1.01996	1.03957
ILMN_2377733	CASP8	Caspases_Initiator	6.0662	6.06605	6.08904	6.0843	0.539459	-1.01273	CRC down vs Normal	-1.05506	1.02871
ILMN_1787749	CASP8	Caspases_Initiator	5.91065	5.91261	5.90988	5.90957	0.88112	1.00211	CRC up vs Normal	-1.02629	1.03063
ILMN_1809313	CASP8	Caspases_Initiator	5.68413	5.68262	5.68366	5.68504	0.897433	-1.00168	CRC down vs Normal	-1.02793	1.02449
ILMN_1797578	CASP10	Caspases_Initiator	6.29044	6.28736	6.29294	6.28839	0.967685	-1.00072	CRC down vs Normal	-1.03652	1.03504
ILMN_1694177	PCNA	DNA_Repair	9.85387	9.84822	9.22126	9.19466	1.52539e-11	1.57305	CRC up vs Normal	1.40793	1.75753
ILMN_1729051	MSH6	DNA_Repair	9.42189	9.4259	8.9636	8.94546	3.12483e-11	1.39517	CRC up vs Normal	1.28365	1.51638
ILMN_2311089	BRCA1	DNA_Repair	6.9819	6.97217	6.49266	6.50238	1.96561e-09	1.38491	CRC up vs Normal	1.26152	1.52037
ILMN_1677887	PMS2	DNA_Repair	7.10062	7.10473	6.91758	6.91376	1.32984e-08	1.14153	CRC up vs Normal	1.09602	1.18894
ILMN_1738027	BRCA1	DNA_Repair	7.39614	7.39184	7.06547	7.07585	5.0605e-08	1.24487	CRC up vs Normal	1.15958	1.33643
ILMN_1700847	PMS1	DNA_Repair	6.46145	6.46017	6.30154	6.29854	5.33966e-06	1.11855	CRC up vs Normal	1.06922	1.17016
ILMN_2282282	MLH3	DNA_Repair	6.27603	6.27625	6.21578	6.21081	0.000122949	1.0464	CRC up vs Normal	1.02346	1.06986
ILMN_1737413	MSH2	DNA_Repair	6.67467	6.67013	6.59204	6.57895	0.000390335	1.06524	CRC up vs Normal	1.0299	1.1018
ILMN_1693107	MLH3	DNA_Repair	6.33945	6.3323	6.27016	6.26369	0.000919905	1.04871	CRC up vs Normal	1.02042	1.07778
ILMN_2203453	MSH2	DNA_Repair	6.46945	6.47476	6.39585	6.39893	0.00109776	1.05397	CRC up vs Normal	1.02208	1.08685
ILMN_2077130	MSH3	DNA_Repair	14.345	14.3468	14.422	14.4301	0.0021972	-1.05947	CRC down vs Normal	-1.0985	-1.02183
ILMN_2329744	PMS2	DNA_Repair	6.06037	6.06124	5.9937	5.99055	0.00323082	1.05022	CRC up vs Normal	1.01715	1.08436
ILMN_1791466	HMGB1	DNA_Repair	6.7486	6.74179	6.66852	6.67141	0.00761317	1.04999	CRC up vs Normal	1.01351	1.0878
ILMN_1685682	PCNA	DNA_Repair	5.79343	5.7904	5.73712	5.73422	0.0103048	1.03971	CRC up vs Normal	1.00955	1.07077
ILMN_1706958	PCNA	DNA_Repair	6.77814	6.78436	6.69033	6.69056	0.0157606	1.06718	CRC up vs Normal	1.01273	1.12455
ILMN_2105983	XRCC5	DNA_Repair	8.63625	8.63698	8.50231	8.49037	0.027091	1.10697	CRC up vs Normal	1.01194	1.21091
ILMN_2231242	HMGB1	DNA_Repair	8.06379	8.05187	7.9535	7.94155	0.0294673	1.07947	CRC up vs Normal	1.0079	1.15612
ILMN_1719471	MSH3	DNA_Repair	7.36543	7.3635	7.42659	7.41463	0.146908	-1.03608	CRC down vs Normal	-1.08726	1.01286
ILMN_1795639	MGMT	DNA_Repair	8.83932	8.82481	8.71319	8.73881	0.303785	1.06142	CRC up vs Normal	-1.05679	1.1906
ILMN_1790807	XPC	DNA_Repair	8.49139	8.49721	8.52404	8.53005	0.367863	-1.02302	CRC down vs Normal	-1.07561	1.02775
ILMN_2136576	POLH	DNA_Repair	6.33873	6.33842	6.35096	6.35298	0.399178	-1.01014	CRC down vs Normal	-1.03441	1.01375
ILMN_1788363	MLH1	DNA_Repair	8.19486	8.20486	8.24785	8.24126	0.43905	-1.02555	CRC down vs Normal	-1.09412	1.04028
ILMN_1771065	BRCA1	DNA_Repair	6.31827	6.31694	6.32741	6.32807	0.66092	-1.00775	CRC down vs Normal	-1.04361	1.02763
ILMN_1658221	POLH	DNA_Repair	6.35046	6.35112	6.34999	6.34314	0.754056	1.00555	CRC up vs Normal	-1.03005	1.04151
ILMN_1666652	BRCA1	DNA_Repair	6.39175	6.39128	6.39326	6.39582	0.79666	-1.00315	CRC down vs Normal	-1.0278	1.02136
ILMN_1670300	PMS2	DNA_Repair	6.3342	6.33898	6.33889	6.34364	0.841244	-1.00324	CRC down vs Normal	-1.03594	1.02927
ILMN_2352131	ERBB2	Growth Factor Receptors	9.95213	9.94221	10.0373	10.062	0.166543	-1.08657	CRC down vs Normal	-1.22328	1.03613
ILMN_1717902	ERBB2	Growth Factor Receptors	6.12935	6.12932	6.11538	6.11103	0.28195	1.01276	CRC up vs Normal	-1.01071	1.03667
ILMN_1728761	ERBB2	Growth Factor Receptors	5.7735	5.77044	5.77891	5.77882	0.727982	-1.00582	CRC down vs Normal	-1.03975	1.02775
ILMN_2083946	TGFA	Growth Factors	7.15641	7.15809	7.43731	7.44922	4.08085e-07	-1.2236	CRC down vs Normal	-1.31433	-1.13913
ILMN_1805175	TGFA	Growth Factors	6.98387	6.98343	7.1897	7.20047	7.08931e-06	-1.16235	CRC down vs Normal	-1.23609	-1.093
ILMN_2156172	HK2	Hexokinase	8.14598	8.13843	8.73103	8.73115	9.32484e-11	-1.50809	CRC down vs Normal	-1.6773	-1.35596
ILMN_1723486	HK2	Hexokinase	9.37626	9.38553	10.1076	10.1046	4.90985e-09	-1.64609	CRC down vs Normal	-1.90791	-1.42021
ILMN_2382990	HK1	Hexokinase	10.6842	10.6821	10.8443	10.8482	0.00224915	-1.12197	CRC down vs Normal	-1.20603	-1.04377
ILMN_1755548	HK1	Hexokinase	5.72958	5.73218	5.69307	5.69138	0.055061	1.02868	CRC up vs Normal	-1.00063	1.05886
ILMN_1761829	HK1	Hexokinase	6.40004	6.40348	6.42669	6.42255	0.339312	-1.01331	CRC down vs Normal	-1.04148	1.01431
ILMN_2280871	HK1	Hexokinase	5.78541	5.7801	5.76978	5.76903	0.525697	1.00771	CRC up vs Normal	-1.01649	1.03222
ILMN_1738652	BAD	Pro-Apoptosis	7.69627	7.69132	8.09069	8.09396	6.79126e-14	-1.32193	CRC down vs Normal	-1.40187	-1.24654
ILMN_2321064	BAX	Pro-Apoptosis	7.40323	7.3921	7.0717	7.06329	2.23196e-08	1.25597	CRC up vs Normal	1.16933	1.34903
ILMN_1763386	BID	Pro-Apoptosis	8.07822	8.07531	7.90205	7.87666	1.81001e-05	1.14763	CRC up vs Normal	1.08143	1.21787
ILMN_1729645	BBC3	Pro-Apoptosis	7.06518	7.06809	7.17458	7.1749	0.000111888	-1.07684	CRC down vs Normal	-1.11626	-1.03882
ILMN_1758658	FADD	Pro-Apoptosis	8.35502	8.35473	8.19005	8.18199	0.000123668	1.1272	CRC up vs Normal	1.0631	1.19517
ILMN_2372413	BID	Pro-Apoptosis	7.17131	7.17015	7.02392	7.01014	0.000144177	1.11729	CRC up vs Normal	1.05767	1.18028
ILMN_1685398	BAD	Pro-Apoptosis	6.13993	6.13674	6.25536	6.2445	0.00020879	-1.07756	CRC down vs Normal	-1.11925	-1.03742
ILMN_1805990	BAK1	Pro-Apoptosis	6.75315	6.7421	6.62673	6.62209	0.00651839	1.08675	CRC up vs Normal	1.02438	1.15291
ILMN_2258383	BAX	Pro-Apoptosis	6.22605	6.22273	6.25053	6.25216	0.103187	-1.02061	CRC down vs Normal	-1.04607	1.00426
ILMN_1683300	BAX	Pro-Apoptosis	6.69364	6.69328	6.64831	6.65558	0.179703	1.02648	CRC up vs Normal	-1.01242	1.06674
ILMN_2259495	BID	Pro-Apoptosis	6.36132	6.36505	6.38928	6.38395	0.289751	-1.01318	CRC down vs Normal	-1.03832	1.01148
ILMN_1720360	BAD	Pro-Apoptosis	6.02875	6.02716	6.02378	6.01741	0.609175	1.00678	CRC up vs Normal	-1.0197	1.03358
ILMN_1779356	TP53	Tumor Suppressor Gene	7.17437	7.17964	7.44985	7.45563	1.39398e-09	-1.21082	CRC down vs Normal	-1.27821	-1.14699
ILMN_1784602	CDKN1A	Tumor Suppressor Gene	11.0353	11.0408	11.5641	11.5538	1.92102e-07	-1.42697	CRC down vs Normal	-1.61192	-1.26324
ILMN_1787212	CDKN1A	Tumor Suppressor Gene	6.03692	6.0341	5.93522	5.93127	0.000188279	1.07388	CRC up vs Normal	1.03596	1.11318
ILMN_1726387	NF1	Tumor Suppressor Gene	6.82733	6.82846	6.86876	6.86466	0.112232	-1.0254	CRC down vs Normal	-1.05782	1.00605
ILMN_1659027	SLC2A1	Warburg Effect	9.45983	9.45472	8.76245	8.7953	3.66729e-07	1.57944	CRC up vs Normal	1.34424	1.85579
ILMN_2379788	HIF1A	Warburg Effect	8.39787	8.3788	8.10053	8.11282	0.000616936	1.20246	CRC up vs Normal	1.08553	1.33198
ILMN_1763260	HIF1A	Warburg Effect	7.3799	7.38772	7.09137	7.06364	0.00090416	1.25187	CRC up vs Normal	1.1004	1.42419
ILMN_1681283	HIF1A	Warburg Effect	6.94395	6.94733	6.75164	6.73693	0.00120958	1.15701	CRC up vs Normal	1.06163	1.26097
ILMN_1689001	CDK4	anti-TSG	10.0763	10.0777	9.25854	9.24183	3.60302e-22	1.7849	CRC up vs Normal	1.64874	1.9323
ILMN_1665559	CDK2	anti-TSG	8.68905	8.69262	8.02696	8.0031	2.49946e-16	1.61275	CRC up vs Normal	1.47763	1.76022
ILMN_1747911	CDC2	anti-TSG	8.51977	8.52111	7.68493	7.64927	5.67779e-15	1.83001	CRC up vs Normal	1.62415	2.06196
ILMN_1710428	CDC2	anti-TSG	7.02772	7.02473	6.57024	6.55623	1.69521e-13	1.38367	CRC up vs Normal	1.29013	1.484
ILMN_1653443	CDK2	anti-TSG	6.87278	6.88324	6.62964	6.6128	9.96354e-08	1.20618	CRC up vs Normal	1.13313	1.28394
ILMN_1802615	CDK6	anti-TSG	8.96827	8.95931	8.76961	8.74592	0.00812668	1.15941	CRC up vs Normal	1.04053	1.29186
ILMN_1746493	MDM2	p53 suppressor	6.0567	6.05892	6.02235	6.01616	0.0480867	1.03008	CRC up vs Normal	1.00026	1.0608
ILMN_1814208	MDM2	p53 suppressor	6.10327	6.1025	6.12926	6.13497	0.121815	-1.02276	CRC down vs Normal	-1.05251	1.00619
ILMN_1736829	MDM2	p53 suppressor	6.54577	6.54416	6.51944	6.51772	0.185698	1.0185	CRC up vs Normal	-1.00908	1.04676
ILMN_2389851	MDM2	p53 suppressor	6.12626	6.12791	6.14632	6.14547	0.345177	-1.01225	CRC down vs Normal	-1.03847	1.01349
