# Supplementary material for: Relative Telomere Length Change in Colorectal Carcinoma and its Association with Tumor Characteristics, Gene Expression and Microsatellite Instability
Source: Cancers (Basel). 2022 Apr 30;14(9):2250. doi: 10.3390/cancers14092250 (PMC9105685; doi:10.3390/cancers14092250)
Supplement: Supplementary file 1 [file cancers-14-02250-s001.zip › Table S4_Enrichment_KEGG_InteractionTELshortening.xlsx]

## Sheet: Table S3_Enrichment_KEGG_Intera
function	Enrichment Score	Enrichment p-value	% genes in group that are present	# genes in list	in group	# genes not in list	in group
DNA replication	10.0978	4.11693e-05	36.11	13	23	798	6862
Mucin type O-glycan biosynthesis	8.89017	0.000137736	36.67	11	19	800	6866
Pentose and glucuronate interconversions	8.2283	0.000266991	34.38	11	21	800	6864
Galactose metabolism	7.30755	0.000670455	33.33	10	20	801	6865
Aldosterone-regulated sodium reabsorption	6.82956	0.00108133	29.73	11	26	800	6859
Glycosphingolipid biosynthesis - lacto and neolacto series	6.68994	0.00124336	33.33	9	18	802	6867
Glycosaminoglycan biosynthesis - keratan sulfate	6.25686	0.00191725	42.86	6	8	805	6877
Porphyrin and chlorophyll metabolism	5.5109	0.00404248	25.58	11	32	800	6853
Nucleotide excision repair	5.1379	0.00586998	24.44	11	34	800	6851
Nitrogen metabolism	5.11716	0.00599301	35.29	6	11	805	6874
Mismatch repair	4.88056	0.00759277	30.43	7	16	804	6869
Homologous recombination	4.75612	0.00859893	24.39	10	31	801	6854
Fatty acid degradation	4.25028	0.0142603	22.73	10	34	801	6851
Sulfur metabolism	4.18102	0.0152829	40	4	6	807	6879
Mannose type O-glycan biosynthesis	4.0044	0.0182353	28.57	6	15	805	6870
Ascorbate and aldarate metabolism	3.96502	0.0189676	25.93	7	20	804	6865
Fat digestion and absorption	3.71507	0.0243538	21.95	9	32	802	6853
Amino sugar and nucleotide sugar metabolism	3.66387	0.0256332	20.83	10	38	801	6847
Base excision repair	2.80562	0.0604695	20.59	7	27	804	6858
Hippo signaling pathway - multiple species	2.69629	0.0674554	21.43	6	22	805	6863
Phototransduction	2.69629	0.0674554	21.43	6	22	805	6863
Starch and sucrose metabolism	2.67326	0.069027	20	7	28	804	6857
Selenocompound metabolism	2.52881	0.0797535	25	4	12	807	6873
Proximal tubule bicarbonate reclamation	2.44047	0.0871201	21.74	5	18	806	6867
Glyoxylate and dicarboxylate metabolism	2.41876	0.0890316	20	6	24	805	6861
Type II diabetes mellitus	2.25041	0.105356	17.39	8	38	803	6847
Carbohydrate digestion and absorption	2.25041	0.105356	17.39	8	38	803	6847
Apoptosis - multiple species	2.17227	0.113919	18.75	6	26	805	6859
Fructose and mannose metabolism	2.05928	0.127546	18.18	6	27	805	6858
Renin-angiotensin system	2.02724	0.131699	19.23	5	21	806	6864
One carbon pool by folate	2.02096	0.132528	21.05	4	15	807	6870
Aminoacyl-tRNA biosynthesis	2.00577	0.134556	17.07	7	34	804	6851
Collecting duct acid secretion	1.90742	0.148463	18.52	5	22	806	6863
Tyrosine metabolism	1.75593	0.172747	16.67	6	30	805	6855
ABC transporters	1.65776	0.190565	15.56	7	38	804	6847
Sulfur relay system	1.5946	0.202989	25	2	6	809	6879
Ether lipid metabolism	1.58056	0.205859	15.22	7	39	804	6846
Ferroptosis	1.4213	0.241401	15	6	34	805	6851
Cocaine addiction	1.36941	0.254258	14.29	7	42	804	6843
Tryptophan metabolism	1.34816	0.259718	14.63	6	35	805	6850
Fatty acid biosynthesis	1.33375	0.263487	17.65	3	14	808	6871
Lipoic acid metabolism	1.25869	0.284027	33.33	1	2	810	6883
Non-homologous end-joining	0.90411	0.404902	15.38	2	11	809	6874
Histidine metabolism	0.883141	0.413482	13.64	3	19	808	6866
Cholesterol metabolism	0.881365	0.414217	12.24	6	43	805	6842
N-Glycan biosynthesis	0.881365	0.414217	12.24	6	43	805	6842
Nicotine addiction	0.878554	0.415383	12.5	5	35	806	6850
RNA polymerase	0.87814	0.415555	12.9	4	27	807	6858
Neomycin, kanamycin and gentamicin biosynthesis	0.850889	0.427035	20	1	4	810	6881
Autophagy - other	0.820676	0.440134	12.5	4	28	807	6857
Other types of O-glycan biosynthesis	0.81491	0.442679	13.04	3	20	808	6865
Glycosphingolipid biosynthesis - ganglio series	0.735059	0.479477	13.33	2	13	809	6872
Phosphonate and phosphinate metabolism	0.718561	0.487453	16.67	1	5	810	6880
Nicotinate and nicotinamide metabolism	0.71686	0.488283	11.76	4	30	807	6855
Vitamin digestion and absorption	0.69472	0.499214	12	3	22	808	6863
Prion diseases	0.669984	0.511717	11.43	4	31	807	6854
Glycosylphosphatidylinositol (GPI)-anchor biosynthesis	0.641751	0.52637	11.54	3	23	808	6862
Maturity onset diabetes of the young	0.641751	0.52637	11.54	3	23	808	6862
Alanine, aspartate and glutamate metabolism	0.626145	0.534649	11.11	4	32	807	6853
Phenylalanine metabolism	0.601423	0.548031	11.76	2	15	809	6870
Fatty acid elongation	0.59296	0.552689	11.11	3	24	808	6861
Thyroid cancer	0.585136	0.55703	10.81	4	33	807	6852
Linoleic acid metabolism	0.547974	0.57812	10.71	3	25	808	6860
Various types of N-glycan biosynthesis	0.546765	0.578819	10.53	4	34	807	6851
Riboflavin metabolism	0.527858	0.589867	12.5	1	7	810	6878
Pyruvate metabolism	0.510856	0.599982	10.26	4	35	807	6850
Glycine, serine and threonine metabolism	0.510856	0.599982	10.26	4	35	807	6850
Pentose phosphate pathway	0.506468	0.60262	10.34	3	26	808	6859
Glycosaminoglycan degradation	0.494305	0.609995	10.53	2	17	809	6868
Glycosaminoglycan biosynthesis - chondroitin sulfate / dermatan sulfate	0.448698	0.638459	10	2	18	809	6867
Bladder cancer	0.445772	0.64033	9.76	4	37	807	6848
Antifolate resistance	0.432743	0.648727	9.68	3	28	808	6857
Synthesis and degradation of ketone bodies	0.39774	0.671837	10	1	9	810	6876
Type I diabetes mellitus	0.388723	0.677922	9.3	4	39	807	6846
Terpenoid backbone biosynthesis	0.370423	0.690442	9.09	2	20	809	6865
Taurine and hypotaurine metabolism	0.347483	0.706464	9.09	1	10	810	6875
Ubiquinone and other terpenoid-quinone biosynthesis	0.347483	0.706464	9.09	1	10	810	6875
Protein export	0.336819	0.714038	8.7	2	21	809	6864
Sphingolipid metabolism	0.316071	0.729008	8.7	4	42	807	6843
alpha-Linolenic acid metabolism	0.306381	0.736106	8.33	2	22	809	6863
Glycosaminoglycan biosynthesis - heparan sulfate / heparin	0.306381	0.736106	8.33	2	22	809	6863
Arginine and proline metabolism	0.294875	0.744625	8.51	4	43	807	6842
African trypanosomiasis	0.29193	0.746821	8.33	3	33	808	6852
Ovarian steroidogenesis	0.275033	0.759547	8.33	4	44	807	6841
Cysteine and methionine metabolism	0.275033	0.759547	8.33	4	44	807	6841
Folate biosynthesis	0.253732	0.7759	7.69	2	24	809	6861
Thiamine metabolism	0.235796	0.789942	7.14	1	13	810	6872
Biosynthesis of unsaturated fatty acids	0.230978	0.793757	7.41	2	25	809	6860
Butanoate metabolism	0.210295	0.810345	7.14	2	26	809	6859
Glycosphingolipid biosynthesis - globo and isoglobo series	0.20811	0.812118	6.67	1	14	810	6871
Circadian rhythm	0.174369	0.839987	6.67	2	28	809	6857
Primary bile acid biosynthesis	0.162871	0.849701	5.88	1	16	810	6869
Other glycan degradation	0.162871	0.849701	5.88	1	16	810	6869
2-Oxocarboxylic acid metabolism	0.162871	0.849701	5.88	1	16	810	6869
Vasopressin-regulated water reabsorption	0.154408	0.856922	6.82	3	41	808	6844
Basal transcription factors	0.154408	0.856922	6.82	3	41	808	6844
Pantothenate and CoA biosynthesis	0.128091	0.879773	5.26	1	18	810	6867
Steroid biosynthesis	0.128091	0.879773	5.26	1	18	810	6867
Propanoate metabolism	0.119902	0.887007	5.88	2	32	809	6853
SNARE interactions in vesicular transport	0.119902	0.887007	5.88	2	32	809	6853
Arginine biosynthesis	0.113758	0.892474	5	1	19	810	6866
Hedgehog signaling pathway	0.102957	0.902166	6.12	3	46	808	6839
Proteasome	0.0386078	0.962128	4.35	2	44	809	6841
Citrate cycle (TCA cycle)	0.0358117	0.964822	3.33	1	29	810	6856
Intestinal immune network for IgA production	0.0350916	0.965517	4.26	2	45	809	6840
beta-Alanine metabolism	0.0319614	0.968544	3.23	1	30	810	6855
Valine, leucine and isoleucine degradation	0.0318901	0.968613	4.17	2	46	809	6839
Primary immunodeficiency	0.0181436	0.98202	2.78	1	35	810	6850
Malaria	0.00470103	0.99531	2.08	1	47	810	6838
