# Supplementary material for: Relative Telomere Length Change in Colorectal Carcinoma and its Association with Tumor Characteristics, Gene Expression and Microsatellite Instability
Source: Cancers (Basel). 2022 Apr 30;14(9):2250. doi: 10.3390/cancers14092250 (PMC9105685; doi:10.3390/cancers14092250)
Supplement: Supplementary file 1 [file cancers-14-02250-s001.zip › Table S5_GO-ANOVA_GX_KEGG_InteracTELshortening_All Pts.xls]

## Sheet: GO-ANOVA_GX_KEGG_InteracTELshor
# of genes	GO ID	GO Description	p-value(Tissue)	p-value(TelShortening)	p-value(Tissue * TelShortening)	Mean(CRC)	LSMean(CRC)	Mean(Normal)	LSMean(Normal)
60	kegg_pathway_108	DNA replication	4.03774e-201	0.000286556	1.20189e-11	7.90462	7.88388	7.61096	7.61753
94	kegg_pathway_44	Fanconi anemia pathway	1.48872e-74	2.87407e-05	2.1077e-10	7.05825	7.04552	6.94727	6.95001
75	kegg_pathway_230	Aldosterone-regulated sodium reabsorption	4.37366e-114	0.288933	1.6888e-09	7.42358	7.44161	7.7062	7.693
94	kegg_pathway_273	Retinol metabolism	5.53959e-84	4.64074e-05	1.27081e-08	6.77621	6.80516	7.05956	7.05455
73	kegg_pathway_315	Nucleotide excision repair	6.41525e-120	0.00417764	8.51658e-07	7.70328	7.69123	7.53085	7.53418
42	kegg_pathway_162	Proximal tubule bicarbonate reclamation	5.22281e-80	0.509161	8.96005e-06	7.7974	7.82086	8.21941	8.20123
60	kegg_pathway_257	Base excision repair	6.01035e-53	0.00867087	1.8364e-05	7.67222	7.65982	7.53765	7.54077
54	kegg_pathway_280	Aminoacyl-tRNA biosynthesis	1.24019e-49	0.00186497	2.15262e-05	8.34137	8.32735	8.20286	8.20513
49	kegg_pathway_132	Mismatch repair	3.4424e-102	0.236357	6.88542e-05	7.51854	7.50832	7.31665	7.32244
77	kegg_pathway_213	Homologous recombination	1.99486e-54	0.109768	9.40001e-05	7.33486	7.32667	7.22299	7.22658
23	kegg_pathway_323	Nitrogen metabolism	9.02847e-60	0.853427	0.000109823	7.08945	7.12513	7.85932	7.81829
28	kegg_pathway_210	Vitamin digestion and absorption	0.897607	3.35596e-05	0.00014369	6.78845	6.78967	6.76242	6.79161
54	kegg_pathway_18	Pentose and glucuronate interconversions	4.8516e-58	0.0503358	0.00019739	7.08422	7.1088	7.41843	7.41044
44	kegg_pathway_145	RNA polymerase	6.58719e-123	1.29351e-08	0.000619604	7.93244	7.91502	7.72124	7.71671
62	kegg_pathway_93	Basal transcription factors	1.6812e-46	6.11735e-06	0.000639507	7.20305	7.19191	7.10654	7.10492
89	kegg_pathway_126	Steroid hormone biosynthesis	1.50358e-58	0.00768786	0.000825258	6.85102	6.8681	7.06838	7.06637
75	kegg_pathway_288	Amino sugar and nucleotide sugar metabolism	3.34722e-14	0.930055	0.0018776	7.76316	7.77005	7.84738	7.84057
68	kegg_pathway_160	Ether lipid metabolism	2.0102e-44	1.77249e-05	0.00195911	7.16206	7.17975	7.32156	7.32456
46	kegg_pathway_17	Ascorbate and aldarate metabolism	1.50087e-37	0.108872	0.00200714	6.98628	7.0082	7.27457	7.26731
30	kegg_pathway_135	One carbon pool by folate	1.32499e-33	0.0410523	0.00262501	7.61835	7.60282	7.43859	7.4417
43	kegg_pathway_36	Mucin type O-glycan biosynthesis	0.10027	0.0401821	0.002891	6.99455	7.00799	7.02947	7.02688
70	kegg_pathway_287	Porphyrin and chlorophyll metabolism	2.1487e-34	0.206649	0.00573104	7.0408	7.05345	7.22433	7.21941
44	kegg_pathway_63	Pentose phosphate pathway	4.84105e-06	0.970678	0.00637741	7.78459	7.77727	7.71587	7.72373
71	kegg_pathway_125	Cholesterol metabolism	2.47417e-05	0.0317747	0.0078124	7.3558	7.35468	7.38316	7.39406
38	kegg_pathway_149	Phototransduction	1.19719e-24	0.951612	0.0121674	6.91623	6.92077	7.00359	6.99907
83	kegg_pathway_115	Sphingolipid metabolism	1.06439e-27	0.00565866	0.0159862	7.3345	7.34324	7.42205	7.42268
82	kegg_pathway_179	ABC transporters	3.80106e-52	0.107823	0.0164545	6.70059	6.70743	6.82097	6.81956
47	kegg_pathway_41	Maturity onset diabetes of the young	7.73859e-06	5.25644e-05	0.0182276	6.50752	6.52211	6.56194	6.56595
91	kegg_pathway_45	Glutathione metabolism	3.35226e-06	0.000220096	0.0188949	7.76918	7.77233	7.80434	7.8191
74	kegg_pathway_48	Fatty acid degradation	3.13231e-110	0.0384446	0.0215014	7.53651	7.54675	7.77505	7.77449
44	kegg_pathway_86	Collecting duct acid secretion	7.53399e-21	0.341016	0.0220086	7.70799	7.71246	7.85871	7.84741
32	kegg_pathway_194	Terpenoid backbone biosynthesis	1.60625e-10	0.202809	0.0341948	7.93649	7.93965	8.05592	8.04267
22	kegg_pathway_209	Other glycan degradation	2.99841e-21	0.129825	0.0396152	7.92232	7.93542	8.08782	8.08573
7	kegg_pathway_308	Caffeine metabolism	5.47249e-22	0.20747	0.0402304	6.47025	6.4937	6.80011	6.79425
30	kegg_pathway_177	Glycosaminoglycan biosynthesis - heparan sulfate / heparin	1.04542e-13	0.163459	0.0415256	6.96752	6.95986	6.88673	6.88824
57	kegg_pathway_266	Galactose metabolism	4.22528e-36	0.0939446	0.0421766	7.28018	7.29015	7.43711	7.43611
55	kegg_pathway_173	African trypanosomiasis	0.348464	0.0178162	0.0425545	7.33749	7.35298	7.33752	7.33877
94	kegg_pathway_33	Regulation of lipolysis in adipocytes	0.00254812	0.822917	0.0527958	6.78638	6.78948	6.81065	6.80808
15	kegg_pathway_284	Sulfur metabolism	7.03397e-37	0.684403	0.0536611	8.11025	8.12444	8.47205	8.46238
49	kegg_pathway_304	Autophagy - other	1.96978e-07	0.146921	0.0569473	7.56811	7.56889	7.61346	7.60743
26	kegg_pathway_246	Non-homologous end-joining	2.09596e-29	0.336794	0.058807	7.16847	7.16192	7.04731	7.04955
44	kegg_pathway_116	Glycosphingolipid biosynthesis - lacto and neolacto series	5.33466e-12	0.88571	0.0606487	6.73673	6.74055	6.81083	6.80617
65	kegg_pathway_62	Glycine, serine and threonine metabolism	0.989561	0.663893	0.0640593	7.0469	7.042	7.03895	7.04212
15	kegg_pathway_220	Synthesis and degradation of ketone bodies	2.1836e-21	0.490217	0.066947	7.27126	7.27871	7.56522	7.54803
70	kegg_pathway_224	Starch and sucrose metabolism	5.44597e-36	0.243369	0.0686311	7.04458	7.05152	7.17867	7.17708
30	kegg_pathway_164	Selenocompound metabolism	0.0559064	0.481735	0.0738174	7.26224	7.25652	7.23503	7.23763
81	kegg_pathway_23	Cysteine and methionine metabolism	7.07094e-13	0.0188385	0.0750085	7.72856	7.72057	7.66191	7.66076
59	kegg_pathway_78	Propanoate metabolism	5.55844e-41	0.902918	0.0769444	7.80508	7.80944	7.94707	7.9431
11	kegg_pathway_199	Neomycin, kanamycin and gentamicin biosynthesis	0.826591	0.70653	0.104488	7.19068	7.20291	7.20512	7.19715
9	kegg_pathway_66	Vitamin B6 metabolism	1.19721e-06	0.0978558	0.113536	7.73901	7.7164	7.57041	7.56988
90	kegg_pathway_175	Type II diabetes mellitus	0.963267	0.445725	0.119915	6.86313	6.86666	6.86822	6.86696
90	kegg_pathway_215	Cocaine addiction	0.109428	0.147946	0.120306	6.93245	6.9373	6.94861	6.94843
55	kegg_pathway_61	Hippo signaling pathway - multiple species	7.27031e-25	0.343013	0.134849	6.76196	6.75774	6.68007	6.68106
35	kegg_pathway_3	Mannose type O-glycan biosynthesis	0.459002	0.00173688	0.139197	7.0885	7.07946	7.08909	7.08571
26	kegg_pathway_111	Thiamine metabolism	0.0923215	0.85292	0.139867	7.41061	7.41497	7.44534	7.43946
56	kegg_pathway_57	Nicotine addiction	0.0130374	0.0822266	0.141908	6.12579	6.12606	6.11182	6.11522
31	kegg_pathway_172	alpha-Linolenic acid metabolism	2.55341e-12	0.00526489	0.144024	6.87341	6.88957	6.99912	7.0044
95	kegg_pathway_328	Long-term depression	2.54936e-22	0.082156	0.150247	7.12989	7.13439	7.19324	7.19368
94	kegg_pathway_296	Basal cell carcinoma	8.15637e-18	0.571895	0.152601	6.74289	6.73988	6.68257	6.68393
23	kegg_pathway_313	Glycosphingolipid biosynthesis - ganglio series	6.16881e-08	0.244777	0.153062	7.24596	7.25442	7.33155	7.33064
51	kegg_pathway_279	Nicotinate and nicotinamide metabolism	0.0157868	0.569716	0.159926	7.20007	7.20476	7.23157	7.22949
21	kegg_pathway_176	Glycosaminoglycan biosynthesis - keratan sulfate	0.555984	0.72617	0.160497	6.98955	6.98441	6.97378	6.977
71	kegg_pathway_232	Ovarian steroidogenesis	9.72628e-08	0.0536005	0.162387	6.87543	6.88201	6.9263	6.9274
68	kegg_pathway_256	Valine, leucine and isoleucine degradation	1.54142e-61	0.759053	0.167694	7.82318	7.82579	8.00431	8.00003
52	kegg_pathway_178	beta-Alanine metabolism	0.000176631	0.993373	0.184774	7.22386	7.22077	7.25495	7.25814
74	kegg_pathway_322	Proteasome	3.31043e-84	0.120293	0.187143	9.02128	9.01626	8.86922	8.86879
95	kegg_pathway_221	Carbohydrate digestion and absorption	2.23798e-32	0.00114604	0.190347	7.13684	7.14478	7.23017	7.2337
23	kegg_pathway_24	Glycosaminoglycan biosynthesis - chondroitin sulfate / dermatan sulfate	3.28309e-05	0.826552	0.214914	7.22871	7.22524	7.15916	7.16435
45	kegg_pathway_169	Butanoate metabolism	5.89131e-35	0.63713	0.250425	6.97476	6.9767	7.13482	7.12996
11	kegg_pathway_19	Riboflavin metabolism	0.230319	0.474833	0.254486	7.60652	7.60887	7.59105	7.58035
69	kegg_pathway_76	Primary immunodeficiency	9.76927e-109	7.20956e-06	0.26744	6.95896	6.97096	7.17039	7.17796
71	kegg_pathway_123	Ferroptosis	0.0423711	0.322756	0.276951	8.07392	8.07372	8.08722	8.09169
31	kegg_pathway_278	Pantothenate and CoA biosynthesis	0.00297286	0.458191	0.277155	7.07211	7.07734	7.11492	7.11389
89	kegg_pathway_155	Pyrimidine metabolism	2.11956e-15	0.0243022	0.286376	7.59737	7.59533	7.54271	7.53676
69	kegg_pathway_225	Malaria	8.6432e-22	0.0859257	0.295427	7.51019	7.52012	7.36891	7.37143
11	kegg_pathway_228	Phosphonate and phosphinate metabolism	0.331064	0.33091	0.305984	7.5073	7.49923	7.51592	7.51614
76	kegg_pathway_6	Pyruvate metabolism	4.64826e-18	0.443207	0.318632	7.83175	7.82824	7.9019	7.90238
75	kegg_pathway_181	Vasopressin-regulated water reabsorption	5.69088e-10	0.334267	0.332735	7.60774	7.61051	7.64884	7.64883
91	kegg_pathway_242	Arachidonic acid metabolism	0.00184065	8.6327e-07	0.340206	6.99684	7.00919	7.02865	7.03737
25	kegg_pathway_117	Glycosphingolipid biosynthesis - globo and isoglobo series	0.00233542	0.874116	0.349099	6.77654	6.77375	6.73827	6.74034
33	kegg_pathway_54	Fatty acid biosynthesis	0.602463	0.896838	0.355379	7.13668	7.13366	7.12484	7.12723
36	kegg_pathway_112	Linoleic acid metabolism	1.21493e-09	0.000188891	0.361735	6.71607	6.73179	6.81044	6.82042
4	kegg_pathway_297	Biotin metabolism	0.245356	0.8487	0.363156	6.63827	6.63447	6.60201	6.60808
39	kegg_pathway_64	Histidine metabolism	9.88703e-15	0.0986883	0.366889	7.43152	7.4338	7.5273	7.53542
73	kegg_pathway_334	Arginine and proline metabolism	0.493109	0.505799	0.421909	7.79515	7.79479	7.78302	7.78704
6	kegg_pathway_151	D-Glutamine and D-glutamate metabolism	3.39898e-09	0.73289	0.422909	7.71612	7.71361	7.84748	7.854
37	kegg_pathway_1	Asthma	5.34973e-46	2.55983e-06	0.428317	7.58331	7.60293	7.88409	7.91289
97	kegg_pathway_29	Notch signaling pathway	1.70716e-13	0.482524	0.430453	7.27336	7.27135	7.22854	7.22866
43	kegg_pathway_34	Folate biosynthesis	0.146834	0.710555	0.437439	7.30096	7.29744	7.31527	7.31657
28	kegg_pathway_69	Phenylalanine metabolism	0.0278176	0.215386	0.459125	7.10709	7.10884	7.13479	7.14205
55	kegg_pathway_163	Fat digestion and absorption	2.82729e-30	3.05521e-07	0.488836	7.0082	7.02574	7.16079	7.17475
71	kegg_pathway_110	Intestinal immune network for IgA production	4.34671e-106	1.3619e-10	0.495935	7.26143	7.28508	7.58213	7.60211
43	kegg_pathway_267	Renin-angiotensin system	1.52794e-06	0.0167943	0.499825	7.15365	7.16334	7.22312	7.22879
97	kegg_pathway_148	Inflammatory bowel disease (IBD)	2.57841e-30	0.000260276	0.530345	7.31681	7.32388	7.42891	7.43937
63	kegg_pathway_134	Tryptophan metabolism	1.78023e-27	0.132699	0.530709	7.36022	7.36232	7.46918	7.47451
60	kegg_pathway_58	Graft-versus-host disease	3.97387e-46	3.92393e-05	0.543514	7.68119	7.69875	7.91466	7.92828
55	kegg_pathway_133	Tyrosine metabolism	1.14892e-20	0.0544711	0.569248	6.97622	6.98362	7.0989	7.1031
54	kegg_pathway_129	Prion diseases	2.53745e-10	0.119211	0.570735	7.60366	7.6101	7.68947	7.69261
44	kegg_pathway_156	Other types of O-glycan biosynthesis	2.29845e-05	0.362806	0.57196	7.52982	7.52675	7.48955	7.4888
62	kegg_pathway_75	Circadian rhythm	0.0541597	0.488502	0.583115	7.31687	7.31888	7.33202	7.33226
89	kegg_pathway_138	Vibrio cholerae infection	5.74181e-14	0.478757	0.583341	8.40138	8.40111	8.34912	8.34692
97	kegg_pathway_295	Legionellosis	5.23246e-24	0.321118	0.58363	8.08843	8.09206	7.98838	7.98948
40	kegg_pathway_327	Glycosylphosphatidylinositol (GPI)-anchor biosynthesis	0.376321	0.0222778	0.596444	7.46035	7.45626	7.45425	7.4474
86	kegg_pathway_192	Hedgehog signaling pathway	0.612625	0.225037	0.602862	6.91802	6.92036	6.91643	6.91741
15	kegg_pathway_119	Ubiquinone and other terpenoid-quinone biosynthesis	0.00559227	0.907234	0.603705	7.7774	7.77497	7.72786	7.72947
60	kegg_pathway_325	Type I diabetes mellitus	1.11953e-20	0.000116163	0.621807	8.06276	8.07923	8.21825	8.23156
50	kegg_pathway_13	Citrate cycle (TCA cycle)	1.58992e-60	0.107382	0.637731	8.43468	8.43958	8.60465	8.60745
71	kegg_pathway_171	Bladder cancer	1.35483e-50	0.966106	0.63884	7.64398	7.64523	7.4574	7.45583
31	kegg_pathway_196	Protein export	0.000500187	0.540677	0.643753	9.03602	9.03881	8.99946	8.99987
7	kegg_pathway_107	Phenylalanine, tyrosine and tryptophan biosynthesis	0.00441365	0.529895	0.650685	7.34824	7.34745	7.40774	7.40266
62	kegg_pathway_243	Alanine, aspartate and glutamate metabolism	6.39115e-07	0.230996	0.6547	7.22364	7.22537	7.17199	7.17596
16	kegg_pathway_206	Sulfur relay system	0.204097	0.642173	0.66168	7.1898	7.18696	7.20427	7.20418
30	kegg_pathway_144	Arginine biosynthesis	0.0144688	0.035218	0.752638	7.50632	7.51416	7.54915	7.56022
44	kegg_pathway_231	Fatty acid elongation	2.5871e-05	0.98881	0.765653	7.72951	7.73028	7.77595	7.77522
5	kegg_pathway_290	Valine, leucine and isoleucine biosynthesis	0.88569	0.627082	0.782723	7.27983	7.27802	7.29022	7.28335
27	kegg_pathway_97	2-Oxocarboxylic acid metabolism	3.63221e-12	0.847741	0.786145	8.37053	8.3722	8.48044	8.48014
52	kegg_pathway_305	Fructose and mannose metabolism	0.0276265	0.0536344	0.787027	7.85982	7.86489	7.82895	7.83596
57	kegg_pathway_302	Various types of N-glycan biosynthesis	0.84876	0.43493	0.793143	7.42734	7.42542	7.42792	7.42693
50	kegg_pathway_198	SNARE interactions in vesicular transport	0.0212189	0.88007	0.807452	7.46908	7.46984	7.4892	7.48901
72	kegg_pathway_87	Apoptosis - multiple species	3.47608e-05	0.536238	0.810868	7.07771	7.07711	7.10652	7.10511
51	kegg_pathway_49	Antifolate resistance	1.417e-20	0.264052	0.815543	7.35836	7.35462	7.24624	7.24369
6	kegg_pathway_166	Lipoic acid metabolism	4.38062e-05	0.157617	0.862462	6.75961	6.75324	6.82942	6.82421
45	kegg_pathway_185	Biosynthesis of unsaturated fatty acids	0.964089	0.600171	0.874342	7.59452	7.59548	7.59412	7.59599
89	kegg_pathway_127	Amyotrophic lateral sclerosis (ALS)	3.33874e-12	0.365844	0.886456	7.2143	7.2132	7.25809	7.25651
27	kegg_pathway_70	Steroid biosynthesis	9.33347e-09	0.0624415	0.886958	7.98907	7.99609	7.8866	7.89514
91	kegg_pathway_301	Fatty acid metabolism	2.21055e-20	0.958223	0.912852	7.65237	7.65267	7.72784	7.72773
79	kegg_pathway_9	N-Glycan biosynthesis	7.14534e-05	0.362846	0.927507	7.47994	7.47865	7.4532	7.45154
36	kegg_pathway_152	Glycosaminoglycan degradation	0.000612106	0.39517	0.928358	7.27291	7.27497	7.24096	7.2427
75	kegg_pathway_5	Autoimmune thyroid disease	7.07522e-58	6.27299e-07	0.929191	7.34275	7.35677	7.53452	7.54866
76	kegg_pathway_277	Thyroid cancer	0.00538199	0.618672	0.934742	7.37859	7.3778	7.35632	7.35518
90	kegg_pathway_235	Cytosolic DNA-sensing pathway	1.63457e-06	0.124774	0.959422	7.47006	7.46726	7.43141	7.42829
49	kegg_pathway_319	Allograft rejection	9.3916e-63	1.89334e-06	0.975316	8.00138	8.02118	8.30061	8.32104
22	kegg_pathway_38	Taurine and hypotaurine metabolism	0.773731	0.376795	0.980568	6.4981	6.50099	6.50207	6.50492
50	kegg_pathway_237	Glyoxylate and dicarboxylate metabolism	9.79383e-27	0.900654	0.98312	7.88138	7.88174	7.9941	7.99436
23	kegg_pathway_67	Primary bile acid biosynthesis	0.590353	0.114095	0.984789	7.22508	7.23108	7.21576	7.22218
